# Supplementary material
Source: PubMed Central journal article supplement (PMC7444943)
Supplement: NIHMS1615458-supplement-1.pdf [file NIHMS1615458-supplement-1.pdf]

# Docetaxel, Bevacizumab, and Everolimus for CRPC

**Supplemental Table 1 Complete List of Toxicities by CTC Grade and Body System**

| Body System                 | CTC Name                          | G1 | G2 | G3 | G4 | G5 |
|-----------------------------|-----------------------------------|----|----|----|----|----|
| Allergy/immunology          | Allergic rhinitis                 | 1  | 0  | 0  | 0  | 0  |
| Blood/bone marrow           | Hemoglobin                        | 14 | 16 | 2  | 0  | 0  |
|                             | Leukocytes                        | 6  | 5  | 6  | 4  | 0  |
|                             | Lymphopenia                       | 10 | 4  | 12 | 0  | 0  |
|                             | Neutrophils                       | 2  | 2  | 8  | 2  | 0  |
|                             | Platelets                         | 2  | 0  | 0  | 0  | 0  |
| Constitutional symptoms     | Fatigue                           | 47 | 17 | 3  | 0  | 0  |
|                             | Fever                             | 5  | 0  | 0  | 0  | 0  |
|                             | Weight loss                       | 2  | 0  | 0  | 0  | 0  |
| Dermatologic                | Alopecia                          | 43 | 12 | 0  | 0  | 0  |
|                             | Nail changes                      | 16 | 2  | 0  | 0  | 0  |
|                             | Rash/desquamation                 | 1  | 0  | 0  | 0  | 0  |
|                             | Rash: hand-foot skin reaction     | 4  | 1  | 2  | 0  | 0  |
|                             | Rash: acneiform                   | 0  | 1  | 0  | 0  | 0  |
| Cardiac general             | Hypotension                       | 0  | 1  | 0  | 0  | 0  |
|                             | Hypertension                      | 2  | 2  | 8  | 0  | 0  |
| Gastrointestinal            | Anorexia                          | 34 | 5  | 1  | 0  | 0  |
|                             | Diarrhea                          | 20 | 4  | 1  | 0  | 0  |
|                             | Dysphagia                         | 1  | 0  | 0  | 0  | 0  |
|                             | Constipation                      | 4  | 0  | 0  | 0  | 0  |
|                             | Heartburn/dyspepsia               | 2  | 0  | 0  | 0  | 0  |
|                             | Mucositis                         | 46 | 15 | 2  | 0  | 0  |
|                             | Nausea                            | 31 | 4  | 0  | 0  | 0  |
|                             | Obstruction, GI (small bowel NOS) | 0  | 0  | 1  | 0  | 0  |
|                             | Taste alteration                  | 11 | 0  | 0  | 0  | 0  |
|                             | Vomiting                          | 5  | 2  | 0  | 0  | 0  |
| Hemorrhage/bleeding         | Hemorrhage pulmonary-nose         | 18 | 1  | 0  | 0  | 0  |
|                             | Petechiae/purpura                 | 1  | 0  | 0  | 0  | 0  |
|                             | Hemorrhage, GI (colon)            | 0  | 0  | 1  | 0  | 0  |
| Infection                   | Febrile neutropenia               | 0  | 0  | 11 | 2  | 1  |
|                             | General-port wound                | 0  | 1  | 1  | 0  | 0  |
|                             | Pneumonia                         | 0  | 0  | 3  | 0  | 1  |
|                             | Pulmonary embolism                | 0  | 0  | 1  | 0  | 0  |
|                             | Pulmonary/upper respiratory       | 1  | 0  | 2  | 0  | 1  |
|                             | Infection, NOS                    | 1  | 0  | 1  | 0  | 0  |
| Lymphatic                   | Edema: limb                       | 6  | 1  | 0  | 0  | 0  |
| Metabolic/laboratory        | AST                               | 6  | 2  | 2  | 0  | 0  |
|                             | Cholesterol                       | 4  | 2  | 0  | 0  | 0  |
|                             | GGT                               | 0  | 1  | 0  | 0  | 0  |
|                             | Hyperglycemia                     | 9  | 4  | 0  | 0  | 0  |
|                             | Hypertriglyceridemia              | 15 | 2  | 0  | 0  | 0  |
|                             | Hypokalemia                       | 0  | 0  | 1  | 0  | 0  |
|                             | Metabolic/lab - hematocrit        | 1  | 0  | 0  | 0  | 0  |
|                             | Proteinuria                       | 3  | 10 | 0  | 0  | 0  |
| Musculoskeletal/soft tissue | Osteonecrosis-jaw                 | 0  | 2  | 0  | 0  | 0  |
| Neurology                   | Neuropathy-sensory                | 29 | 1  | 0  | 0  | 0  |
|                             | Cerebrovascular ischemia          | 1  | 0  | 0  | 0  | 0  |
|                             | Syncope                           | 0  | 0  | 1  | 0  | 0  |
| Ocular/visual               | Watery eye                        | 5  | 0  | 0  | 0  | 0  |
| Pain                        | Gastrointestinal-abdomen NOS      | 1  | 0  | 0  | 0  | 0  |
|                             | Pain (back)                       | 1  | 0  | 0  | 0  | 0  |
|                             | Pain (joint)                      | 0  | 1  | 0  | 0  | 0  |
|                             | Pain (middle ear)                 | 1  | 0  | 0  | 0  | 0  |

**Supplemental Table 1** Continued

| Body System                 | CTC Name                          | G1 | G2 | G3 | G4 | G5 |
|-----------------------------|-----------------------------------|----|----|----|----|----|
|                             | Pain (muscle)                     | 1  | 1  | 0  | 0  | 0  |
|                             | Pain (throat/pharynx/larynx)      | 0  | 1  | 0  | 0  | 0  |
|                             | Pain (leg)                        | 0  | 0  | 1  | 0  | 0  |
| Pulmonary/upper respiratory | Cough                             | 1  | 0  | 0  | 0  | 0  |
|                             | Dyspnea                           | 2  | 0  | 0  | 0  | 0  |
|                             | Pneumonitis/pulmonary infiltrates | 1  | 0  | 2  | 0  | 0  |
|                             | Nasal congestion                  | 4  | 1  | 0  | 0  | 0  |
|                             | Voice changes/dysarthria          | 2  | 0  | 0  | 0  | 0  |
| Vascular                    | Embolism                          | 0  | 1  | 0  | 0  | 0  |
|                             | Thrombosis                        | 0  | 2  | 1  | 0  | 0  |

Abbreviations: AST = aspartate aminotransferase; CTC = common toxicity criteria; G = grade; GGT = gamma-glutamyl transferase; GI = gastrointestinal; NOS = not otherwise specified.
